# Supplementary material for: OH–π and halogen–π interactions as driving forces in the crystal organisations of tri-bromo and tri-iodo trityl alcohols
Source: Royal Society of Chemistry journal article supplement (doi:10.1039/b716442d), 2008-01-01
Supplement: b716442d.pdf [file b716442d.pdf]

## Supplementary Information for CrystEngComm

# OH – $\pi$ and halogen – $\pi$ interactions as driving forces in the crystal organisations of tri-bromo and tri-iodo trityl alcohols

Dieter Schollmeyer, Oleg V. Shishkin, Thomas Rühl and Myroslav O. Vysotsky\*

| Content                                                                                                                                                                           | Page |
|-----------------------------------------------------------------------------------------------------------------------------------------------------------------------------------|------|
| <b>Table 1S</b> (Varification of the DFT method)                                                                                                                                  | 2    |
| <b>Table 2S</b> (Geometry of the additional weak hydrogen bonds)                                                                                                                  | 3    |
| <b>Fig. 1S.</b> The prime contacts observed in the structure <b>A</b> after the X-H bond lengths correction: a) C10-H10...Br1 and b) C16-H16...Br2.                               | 4    |
| <b>Fig. 2S.</b> The prime contacts observed in after the X-H bond lengths correction: a) in the structure <b>C</b> , C10-H10...I2 and b) in the structure <b>D</b> , C7-H7...O20. | 5    |

**Table 1S.** Selected geometrical parameters of molecules **1** (X=Br) and **2** (X=I) from X-ray diffraction data and calculations by DFT on the M05-2X/6-311G(d,p) level of theory.

| Parameter      | <b>1</b> | <b>1</b> | <b>2</b> | <b>2</b> |
|----------------|----------|----------|----------|----------|
|                | Exp.     | Calc.    | Exp.     | Calc.    |
| C1-O20         | 1.434    | 1.430    | 1.432    | 1.429    |
| C1-C2          | 1.533    | 1.530    | 1.536    | 1.531    |
| C1-C8          | 1.544    | 1.529    | 1.544    | 1.531    |
| C1-C14         | 1.545    | 1.525    | 1.543    | 1.526    |
| C5-X1          | 1.905    | 1.901    | 2.099    | 2.113    |
| C11-X2         | 1.903    | 1.902    | 2.100    | 2.113    |
| C17-X3         | 1.903    | 1.903    | 2.097    | 2.114    |
| O20-C1-C2      | 108.2    | 108.3    | 108.6    | 107.6    |
| O20-C1-C8      | 109.0    | 109.4    | 110.0    | 109.5    |
| O20-C1-C14     | 106.1    | 105.9    | 106.4    | 106.3    |
| O20-C1-C2-C3   | 90.4     | 110.0    | 89.3     | 98.7     |
| O20-C1-C8-C9   | -19.2    | -33.5    | -17.6    | -29.3    |
| O20-C1-C14-C15 | -0.3     | -25.3    | 1.8      | -8.5     |

**Table 2S.** Geometrical parameters of the additional very weak hydrogen bonds observed after the correction of X-H bond lengths. The prime (P) of secondary (S) types of contacts are indicated.

| Structure | Contact                        | Type of the contact | Contact length (H...X), Å | Contact angle, ° |
|-----------|--------------------------------|---------------------|---------------------------|------------------|
| <b>A</b>  | C3-H3...Br1                    | S                   | 2.95                      | 161.4            |
|           | C10-H10...Br1                  | P                   | 3.01                      | 164.5            |
|           | C19-H19...Br3                  | S                   | 3.00                      | 137.9            |
|           | C16-H16...Br2                  | P                   | 3.05                      | 148.5            |
|           |                                |                     |                           |                  |
| <b>B</b>  | C9-H9...C3( $\pi$ )            | S                   | 2.89                      | 124.2            |
|           | C3-H3...I1                     | S                   | 3.11                      | 156.0            |
|           | C19-H19...I3                   | S                   | 3.18                      | 140.3            |
|           |                                |                     |                           |                  |
| <b>C</b>  | C10-H10...I2                   | P                   | 3.17                      | 165.0            |
|           |                                |                     |                           |                  |
| <b>D</b>  | C16-H16...C3( $\pi$ )          | S                   | 2.86                      | 130.1            |
|           | C15-H15... Centroid of (C2-C7) | S                   | 2.53                      | 146.8            |
|           | C13-H13...C15( $\pi$ )         | S                   | 2.58                      | 163.5            |
|           | C7-H7...O20                    | P                   | 2.56                      | 143.5            |

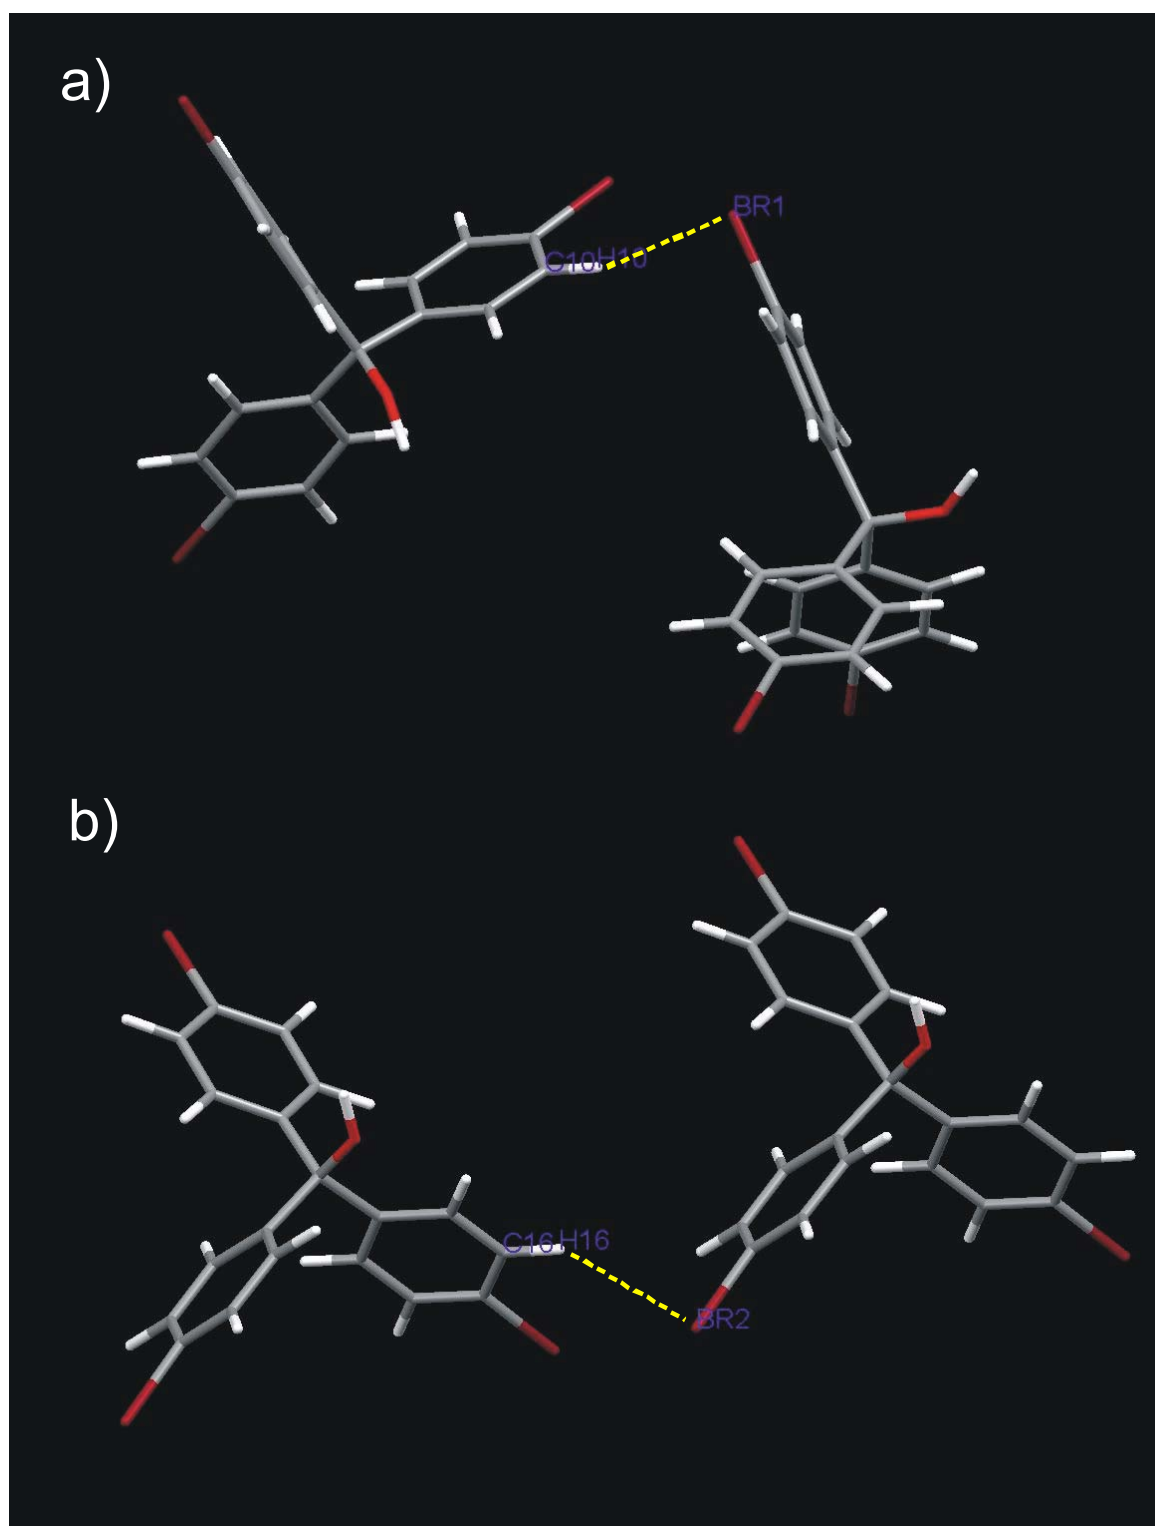

**Fig. 1S.** The prime contacts observed in the structure A after the X-H bond lengths correction:  
a) C10-H10...Br1 and b) C16-H16...Br2.

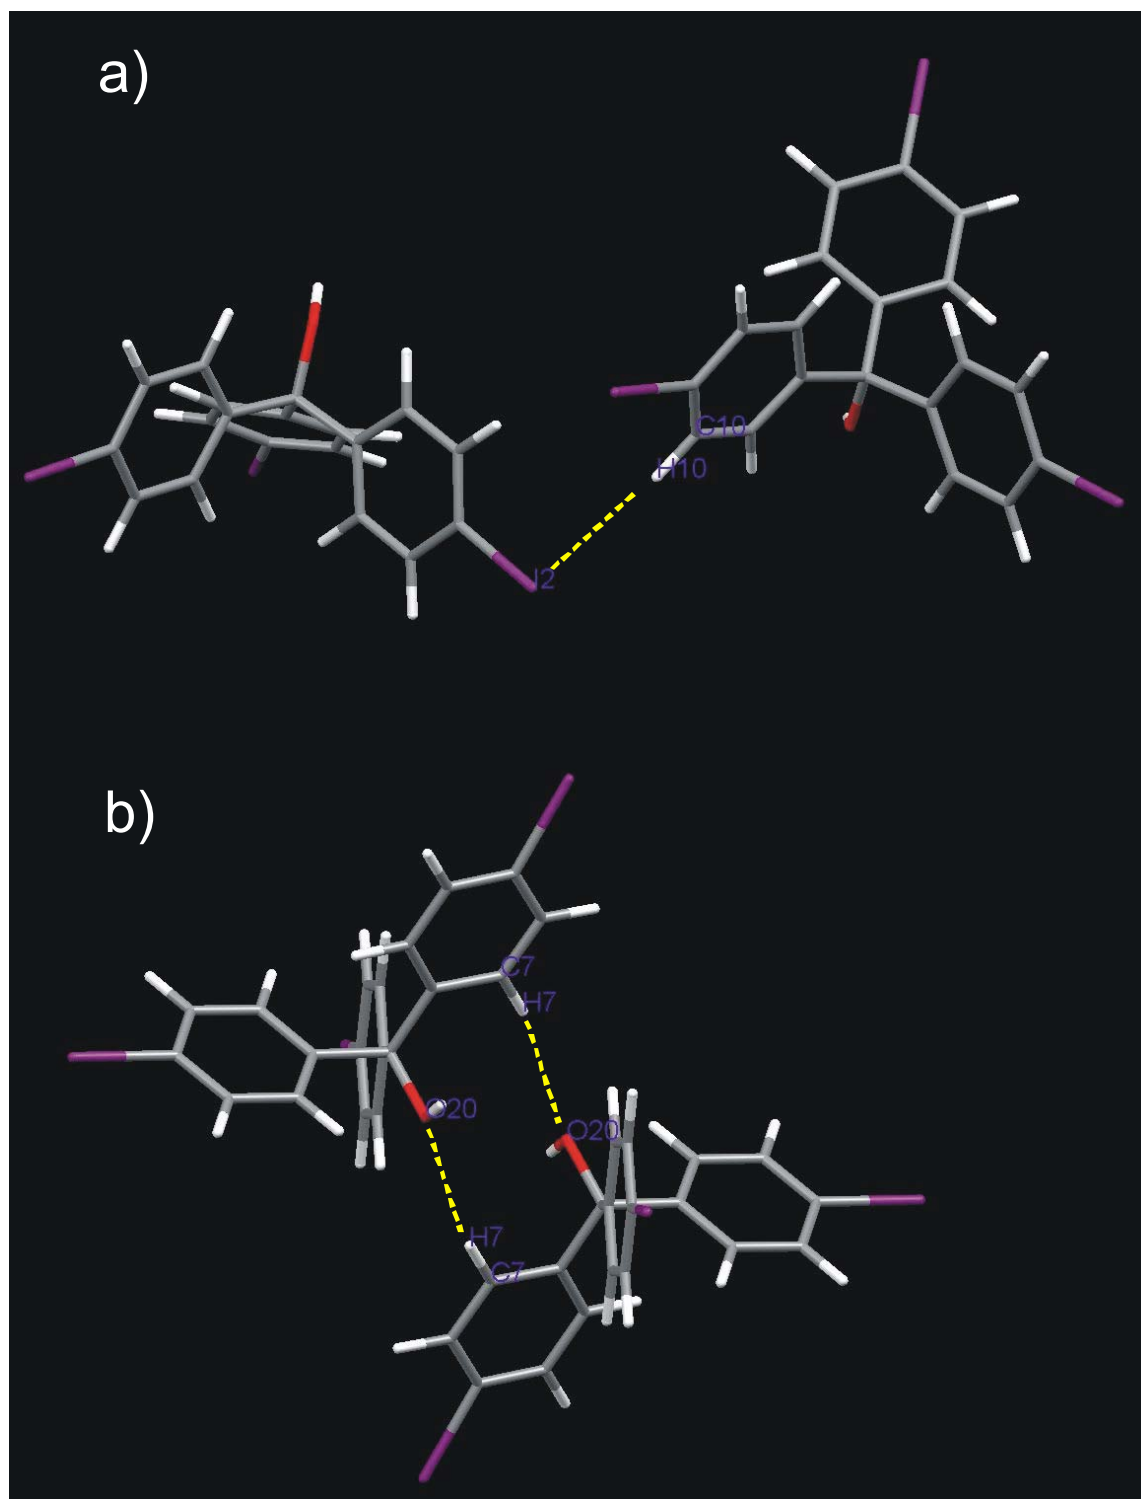

**Fig. 2S.** The prime contacts observed in after the X-H bond lengths correction: a) in the structure **C**, C10-H10...I2 and b) in the structure **D**, C7-H7...O20.
